# Supplementary material for: Assessment of Factors Associated With Mental Well-Being Among Chinese Youths at Individual, School, and Province Levels
Source: PubMed Central journal article supplement (PMC10354672; doi:10.1001/jamanetworkopen.2023.24025), 2023-07-18
Supplement: jamanetwopen-e2324025-s001.pdf [file jamanetwopen-e2324025-s001.pdf]

## Supplemental Online Content

Zhang P, Yang F, Huang N, et al. Assessment of factors associated with mental well-being among Chinese youths at individual, school, and province levels. *JAMA Netw Open*. 2023;6(7):e2324025. doi:10.1001/jamanetworkopen.2023.24025

**eTable 1.** Human Development Index (HDI) of Province of Residence

**eTable 2.** Comparison Between Original and Final Samples

**eTable 3.** Details About Variables

**eTable 4.** Group Differences in Mental Well-Being Among Variables

**eFigure.** Spatial Autocorrelation for Mean Scores of Mental Well-Being

This supplemental material has been provided by the authors to give readers additional information about their work.

eTable 1. Human Development Index (HDI) of Resident Province

| Percentile of the HDI | HDI thresholds | Province                                                                      |
|-----------------------|----------------|-------------------------------------------------------------------------------|
| < 10th                | <0.667         | Guizhou, Qinghai, Xizang, and Yunnan                                          |
| 10th to 25th          | (0.667, 0.708] | Anhui, Gansu, Guangxi, and Sichuan                                            |
| 25th to 50th          | (0.708, 0.733] | Hainan, Hebei, Henan, Heilongjiang, Jiangxi, Ningxia, Shanxi, and Xinjiang    |
| 50th to 70th          | (0.733, 0.754] | Fujian, Hubei, Hunan, Jilin, Inner-Mongolia, Shandong, Shannxi, and Chongqing |
| 75th to 90th          | (0.754, 0.784] | Guangdong, Jiangsu, Liaoning, and Zhejiang                                    |
| > 90th                | > 0.784        | Beijing, Shanghai, and Tianjin                                                |

eTable 2. Comparison between origin sample and final sample.

| Variables                       | Levels         | Selected Sample<br>(N = 398520) | Origin Sample (N =<br>414175) | P-value |
|---------------------------------|----------------|---------------------------------|-------------------------------|---------|
|                                 |                | Mean ± SD/ N (%)                | Mean ± SD/ N (%)              |         |
| Sex                             | Female         | 194460 (48.80%)                 | 202023 (48.78%)               | 0.870   |
|                                 | Male           | 204060 (51.20%)                 | 212152 (51.22%)               |         |
| Age, years                      | Continuous     | 13.78 ± 2.40                    | 13.71 ± 2.41                  | < 0.001 |
| Race                            | Other          | 30852 (7.74%)                   | 32580 (7.87%)                 | 0.037   |
|                                 | Han            | 367668 (92.26%)                 | 381595 (92.13%)               |         |
| BMI                             | Continuous     | 21.06 ± 5.20                    | 21.04 ± 5.24                  | 0.238   |
| Only one child                  | NO             | 290838 (72.98%)                 | 302644 (73.07%)               | 0.352   |
|                                 | Yes            | 107682 (27.02%)                 | 111531 (26.93%)               |         |
| Drinking                        | NO             | 300306 (75.36%)                 | 313752 (75.75%)               | < 0.001 |
|                                 | Yes            | 98214 (24.64%)                  | 100423 (24.25%)               |         |
| Smoking                         | NO             | 371780 (93.29%)                 | 386997 (93.44%)               | 0.008   |
|                                 | Yes            | 26740 (6.71%)                   | 27178 (6.56%)                 |         |
| Days of exercise, day(s)        | ≤ 2 per week   | 157296 (39.47%)                 | 162284 (39.18%)               | 0.028   |
|                                 | 3 - 4 per week | 106500 (26.72%)                 | 111091 (26.82%)               |         |
|                                 | 5 - 7 per week | 134724 (33.81%)                 | 140800 (34.00%)               |         |
| Subjective family SES           | Continuous     | 6.06 ± 1.97                     | 6.08 ± 1.98                   | < 0.001 |
| Self-rated popularity in school | Continuous     | 6.49 ± 2.04                     | 6.50 ± 2.04                   | 0.012   |

|                          |                       |                 |                 |         |
|--------------------------|-----------------------|-----------------|-----------------|---------|
| Objective family SES     | Continuous            | 0.01 ± 0.99     | -0.00 ± 1.00    | 0.002   |
|                          | High school and below | 295409 (74.13%) | 307172 (74.16%) |         |
| Mother's education       | Junior college        | 46334 (11.63%)  | 47741 (11.53%)  | 0.218   |
|                          | Bachelor              | 46970 (11.79%)  | 48834 (11.79%)  |         |
|                          | Master and above      | 9807 (2.46%)    | 10428 (2.52%)   |         |
|                          | Very low HDI          | 23600 (5.92%)   | 25157 (6.07%)   |         |
| HDI of resident province | Low HDI               | 70610 (17.72%)  | 78127 (18.86%)  | < 0.001 |
|                          | Lower-middle HDI      | 84802 (21.28%)  | 87690 (21.17%)  |         |
|                          | Upper-middle HDI      | 142827 (35.84%) | 144126 (34.80%) |         |
|                          | High HDI              | 67655 (16.98%)  | 69730 (16.84%)  |         |
|                          | Very high HDI         | 9026 (2.26%)    | 9345 (2.26%)    |         |
| School type              | Private               | 46077 (11.56%)  | 48498 (11.71%)  | 0.038   |
|                          | Public                | 352443 (88.44%) | 365677 (88.29%) |         |
| Region of school         | Rural                 | 107166 (26.89%) | 115920 (27.99%) | < 0.001 |
|                          | Urban                 | 291354 (73.11%) | 298255 (72.01%) |         |

eTable 3. Details about the variables.

| Variables                       | Levels                | Type     | Assessment    | Note                                                                                                             |
|---------------------------------|-----------------------|----------|---------------|------------------------------------------------------------------------------------------------------------------|
| Mental well-being               | Continuous            | Ratio    | SWEMWBS       | /                                                                                                                |
| Sex                             | Female                | Nominal  | Self-reported | /                                                                                                                |
|                                 | Male                  |          |               |                                                                                                                  |
| Age, years                      | Continuous            | Interval | Self-reported | /                                                                                                                |
| Race                            | Other                 | Nominal  | Self-reported | /                                                                                                                |
|                                 | Han                   |          |               |                                                                                                                  |
| BMI                             | Continuous            | Ratio    | Self-reported | Based on self-reported height and weight                                                                         |
| Only one child                  | NO                    | Nominal  | Self-reported | /                                                                                                                |
|                                 | Yes                   |          |               |                                                                                                                  |
| Drinking                        | NO                    | Nominal  | Self-reported | “whether you drank during your life time’                                                                        |
|                                 | Yes                   |          |               |                                                                                                                  |
| Smoking                         | NO                    | Nominal  | Self-reported | “whether you smoked during your life time’                                                                       |
|                                 | Yes                   |          |               |                                                                                                                  |
| Days of exercise, day(s)        | ≤ 2 per week          | Ordinal  | Self-reported | “how many days do you exercise more than 1 hour in a week”                                                       |
|                                 | 3 - 4 per week        |          |               |                                                                                                                  |
|                                 | 5 - 7 per week        |          |               |                                                                                                                  |
| Subjective family SES           | Continuous            | Interval | Self-reported | ranging from 0 to 10                                                                                             |
| Self-rated popularity in school | Continuous            | Interval | Self-reported | ranging from 0 to 10                                                                                             |
| Objective family SES            | Continuous            | Ratio    | Self-reported | produced with factor analysis based on computer ownership, car ownership, and the education level of the parents |
| Mother's education              | High school and below | Ordinal  | Self-reported | /                                                                                                                |
|                                 | Junior college        |          |               |                                                                                                                  |

|                                         |                  |          |                         |                                                                         |
|-----------------------------------------|------------------|----------|-------------------------|-------------------------------------------------------------------------|
| HDI of resident province                | Bachelor         | Ordinal  | Previous research based | assessed by the health, education and the income level of each province |
|                                         | Master and above |          |                         |                                                                         |
|                                         | Very low HDI     |          |                         |                                                                         |
|                                         | Low HDI          |          |                         |                                                                         |
|                                         | Lower-middle HDI |          |                         |                                                                         |
|                                         | Upper-middle HDI |          |                         |                                                                         |
| School type                             | High HDI         | Nominal  | Self-reported           | /                                                                       |
|                                         | Very high HDI    |          |                         |                                                                         |
| Region of school                        | Private          | Nominal  | Self-reported           | /                                                                       |
|                                         | Official         |          |                         |                                                                         |
| Shopping institutions around school     | Rural            | Nominal  | Self-reported           | /                                                                       |
|                                         | Urban            |          |                         |                                                                         |
| Exercise institutions around school     | Continuous       |          |                         |                                                                         |
| Traffic stations around school          | Continuous       |          |                         |                                                                         |
| Natural sceneries around school         | Continuous       | Interval | Calculated              | obtained by Baidu map (a widely used guide application in China)        |
| Tourist locations around school         | Continuous       |          |                         |                                                                         |
| Education institutions around school    | Continuous       |          |                         |                                                                         |
| Psychological activities held by school | None             | Ordinal  | Self-reported           | i.e., psychological games                                               |
|                                         | 1/year           |          |                         |                                                                         |
|                                         | ≥ 1/semester     |          |                         |                                                                         |

|                       |                                  |         |               |                                       |
|-----------------------|----------------------------------|---------|---------------|---------------------------------------|
| Psychological courses | None                             | Ordinal | Self-reported | i.e., knowledge about mental health   |
|                       | 1/two weeks for part of students |         |               |                                       |
|                       | 1/week for part of students      |         |               |                                       |
|                       | ≥ 2/week for part of students    |         |               |                                       |
|                       | 1/two weeks for all students     |         |               |                                       |
| Honors of school      | 1/week for all students          | Ordinal | Self-reported | i.e., rewarded by the city government |
|                       | ≥ 2/week for all students        |         |               |                                       |
|                       | None                             |         |               |                                       |
|                       | Awarded in county level          |         |               |                                       |
|                       | Awarded in city level            |         |               |                                       |
|                       | Awarded in province level        |         |               |                                       |
|                       | Awarded in country level         |         |               |                                       |

---

eTable 4. Group differences of mental well-being among variables.

| Variables                       | Mean (SD)/ N (%) | P-value | Effect size ( $\eta^2/r^2$ ) |
|---------------------------------|------------------|---------|------------------------------|
| Sex                             |                  |         |                              |
| Female                          | 194460 (48.80)   |         |                              |
| Male                            | 204060 (51.20)   | < 0.001 | 0.013                        |
| Age, y                          | 13.78 (2.40)     | < 0.001 | 0.027                        |
| Race                            |                  |         |                              |
| Other                           | 30852 (7.74)     |         |                              |
| Han                             | 367668 (92.26)   | < 0.001 | 0.001                        |
| BMI                             | 21.06 (5.20)     | < 0.001 | 0.003                        |
| Only one child                  |                  |         |                              |
| NO                              | 290838 (72.98)   |         |                              |
| Yes                             | 107682 (27.02)   | < 0.001 | 0.006                        |
| Drinking                        |                  |         |                              |
| NO                              | 300306 (75.36)   |         |                              |
| Yes                             | 98214 (24.64)    | < 0.001 | 0.032                        |
| Smoking                         |                  |         |                              |
| NO                              | 371780 (93.29)   |         |                              |
| Yes                             | 26740 (6.71)     | < 0.001 | 0.016                        |
| Days of exercise, day(s)        |                  |         |                              |
| ≤ 2 per week                    | 157296 (39.47)   |         |                              |
| 3 - 4 per week                  | 106500 (26.72)   |         |                              |
| 5 - 7 per week                  | 134724 (33.81)   | < 0.001 | 0.016                        |
| Subjective family SES           | 6.06 (1.97)      | < 0.001 | 0.133                        |
| Self-rated popularity in school | 6.49 (2.04)      | < 0.001 | 0.214                        |



|                                         |                |         |       |
|-----------------------------------------|----------------|---------|-------|
| Objective family SES                    | 0.01 (0.99)    | < 0.001 | 0.027 |
| Mother's education                      |                |         |       |
| High school and below                   | 295409 (74.13) |         |       |
| Junior college                          | 46334 (11.63)  | < 0.001 | 0.022 |
| Bachelor                                | 46970 (11.79)  |         |       |
| Master and above                        | 9807 (2.46)    |         |       |
| HDI of resident province                |                |         |       |
| Low HDI                                 | 70610 (17.72)  |         |       |
| Lower-middle HDI                        | 84802 (21.28)  |         |       |
| Upper-middle HDI                        | 142827 (35.84) | < 0.001 | 0.006 |
| High HDI                                | 67655 (16.98)  |         |       |
| Very high HDI                           | 9026 (2.26)    |         |       |
| Region of school                        |                |         |       |
| Rural                                   | 107166 (26.89) | < 0.001 | 0.006 |
| Urban                                   | 291354 (73.11) |         |       |
| Shopping institutions around school     | 81.15 (19.98)  | < 0.001 | 0.002 |
| Exercise institutions around school     | 31.06 (28.28)  | < 0.001 | 0.004 |
| Traffic stations around school          | 84.76 (25.69)  | < 0.001 | 0.002 |
| Natural sceneries around school         | 10.43 (8.53)   | < 0.001 | 0.001 |
| Tourist locations around school         | 33.41 (32.56)  | < 0.001 | 0.003 |
| Education institutions around school    | 72.35 (31.99)  | < 0.001 | 0.003 |
| Psychological activities held by school |                |         |       |
| None                                    | 39188 (9.83)   | < 0.001 | 0.001 |
| 1/year                                  | 88663 (22.25)  |         |       |

|                       |                                  |                |         |       |
|-----------------------|----------------------------------|----------------|---------|-------|
|                       | ≥ 1/semester                     | 270669 (67.92) |         |       |
| Psychological courses |                                  |                |         |       |
|                       | None                             | 46995 (11.79)  |         |       |
|                       | 1/two weeks for part of students | 94017 (23.59)  |         |       |
|                       | 1/week for part of students      | 80523 (20.21)  |         |       |
|                       | ≥ 2/week for part of students    | 24939 (6.26)   | < 0.001 | 0.004 |
|                       | 1/two weeks for all students     | 96988 (24.34)  |         |       |
|                       | 1/week for all students          | 41354 (10.38)  |         |       |
|                       | ≥ 2/week for all students        | 13704 (3.44)   |         |       |
| Honors of school      |                                  |                |         |       |
|                       | None                             | 54555 (13.69)  |         |       |
|                       | Awarded in county level          | 59572 (14.95)  |         |       |
|                       | Awarded in city level            | 104236 (26.16) | < 0.001 | 0.002 |
|                       | Awarded in province level        | 127499 (31.99) |         |       |
|                       | Awarded in country level         | 52658 (13.21)  |         |       |

---

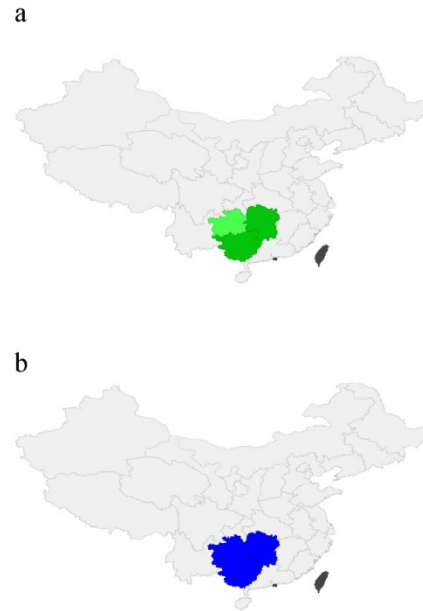

eFigure. Spatial auto-correlation for mean scores of mental well-being in China. a. The blank areas indicate no statistical significance, light green indicates  $p$ -value  $< 0.05$ , green indicates  $p$ -value  $< 0.01$  and the black indicates undefined due to data insufficient. b. The blank areas indicate no statistical significance, blue indicates Low-Low spatial aggregation and the black indicates undefined due to data insufficient.
