# Supplementary material for: Assessment of Factors Associated With Mental Well-Being Among Chinese Youths at Individual, School, and Province Levels
Source: PubMed Central journal article supplement (PMC10354672; doi:10.1001/jamanetworkopen.2023.24025), 2023-07-18
Supplement: jamanetwopen-e2324025-s002.pdf [file jamanetwopen-e2324025-s002.pdf]

## **Data Sharing Statement**

Zhang. Assessment of Factors Associated With Mental Well-Being Among Chinese Youths at Individual, School, and Province Levels. *JAMA Netw Open*. Published online July 18, 2023. doi:10.1001/jamanetworkopen.2023.24025

### **Data**

**Data available:** No
